# Supplementary material
Source: Springer Nature journal article supplement (https://www.springermedizin.de/resource/supplementary/13000_2013_758_MOESM7_ESM.pdf/9625444)

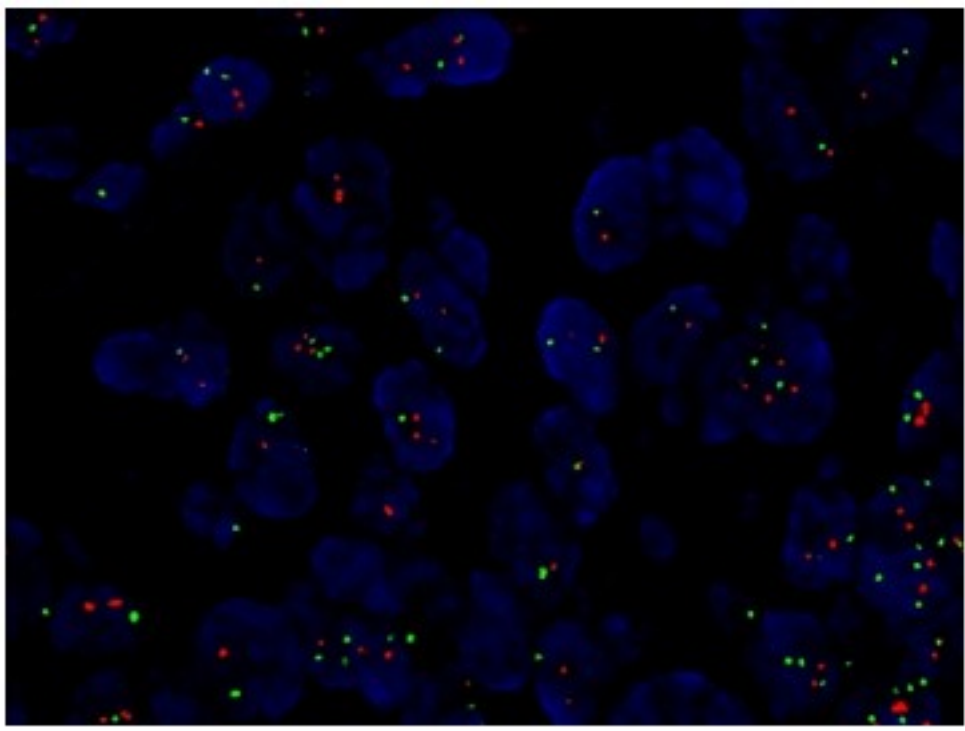

Supplement: MOESM7 [file 9625444]
